# Supplementary material for: Genomic and Immunological Characterization of Hypermucoviscous Carbapenem-Resistant Klebsiella pneumoniae ST25 Isolates from Northwest Argentina
Source: MDPI journal article supplement (doi:10.3390/ijms23137361), 2022-07-01
Supplement: s1 [file s1]

Supplementary Table S1. Unique virulence factors genes detected in the genome of *K. pneumoniae* LABACER 01 compared to strains LABACER 27, NTUH-K2044, ATCC43816, and RFJ293.

| Gen          | Protein                                                                                                                                                                                                                                     |
|--------------|---------------------------------------------------------------------------------------------------------------------------------------------------------------------------------------------------------------------------------------------|
| <i>ompC</i>  | Outer membrane porin C. One of the major outer membrane proteins                                                                                                                                                                            |
| <i>fimC1</i> | Chaperone involved in fimbriae biosynthesis                                                                                                                                                                                                 |
| <i>sfaG1</i> | S-type adhesins, which allow bacteria to adhere to eukaryotic cells                                                                                                                                                                         |
| <i>smfA</i>  | Fimbrial protein A involved in adhesion                                                                                                                                                                                                     |
| <i>hemN</i>  | S-adenosyl-1-methionine enzyme                                                                                                                                                                                                              |
| <i>gltB</i>  | B subunit that is part of the heterodimeric protein glutamate synthetase                                                                                                                                                                    |
| <i>papH</i>  | P pili protein subunits                                                                                                                                                                                                                     |
| <i>papC</i>  | Outer membrane protein that allows assembly and secretion of pili                                                                                                                                                                           |
| <i>yfcS</i>  | Fimbrial chaperone protein encoded in the yfc operon                                                                                                                                                                                        |
| <i>yfcR</i>  | Fimbrial chaperone protein encoded in the yfc operon                                                                                                                                                                                        |
| <i>cbtA</i>  | Toxin of the CbtA-CbeA toxin-antitoxin system. CbtA directly interacts with the cell division proteins FtsZ and MreB and inhibits GTPase activity and GTP-dependent polymerization of FtsZ, as well as ATP-dependent polymerization of MreB |
| <i>cbeA</i>  | cbeA encodes antitoxin protein that prevents the binding of the toxic protein cbtA (neutralizes the toxic effect of cbtA)                                                                                                                   |
| <i>cyoA</i>  | The operon synthesizes subunit II that is part of the ubiquinol oxidase complex                                                                                                                                                             |
| <i>cyoB</i>  | The operon synthesizes the I subunit that is part of the ubiquinol oxidase complex                                                                                                                                                          |
| <i>tamA</i>  | It synthesizes a protein that, together with tamB, is inserted into the outer membrane                                                                                                                                                      |
| <i>tamB</i>  | Synthesizes a protein that, together with tamA, is inserted into the outer membrane                                                                                                                                                         |

Supplementary Table S2. Unique virulence factors genes detected in the genome of *K. pneumoniae* LABACER 27 compared to strains LABACER 01, NTUH-K2044, ATCC43816, and RFJ293.

| Gen          | Protein                                                                                                                                                                   |
|--------------|---------------------------------------------------------------------------------------------------------------------------------------------------------------------------|
| <i>vapB</i>  | The vapBC operon encodes the type II toxin/antitoxin system. vapB produces the DNA gyrase inhibitory toxin                                                                |
| <i>traA</i>  | <i>It belongs to the tra operon, which synthesizes the relaxase enzyme, this is an endonuclease/topoisomerase that recognizes the oriT sequence</i>                       |
| <i>bigR</i>  | Synthesizes repressor protein associated with persulfide-sensitive biofilm growth                                                                                         |
| <i>bfpA</i>  | It is found within the bfp operon, and encodes for the protein that is responsible for localized adhesion in epithelial cells                                             |
| <i>higA</i>  | It is the antitoxin of HigB translation-dependent interferase mRNA toxin                                                                                                  |
| <i>rfaH</i>  | It controls the transcription of a specialized group of operons that direct the synthesis, assembly, and export of exopolysaccharides, F conjugation pilus, and hemolysin |
| <i>copA</i>  | It synthesizes the carrier protein that removes the Cu cation from the bacteria and prevents its accumulation and its bactericidal effect                                 |
| <i>aroE</i>  | Protein involved in serum resistance                                                                                                                                      |
| <i>purH</i>  | Synthesizes the bifunctional enzyme PurH responsible for a step in the purine biosynthetic pathway                                                                        |
| <i>yadV2</i> | Yad pili chaperone proteins, involved in adhesion to the epithelium of the bladder                                                                                        |
| <i>yadV3</i> |                                                                                                                                                                           |
| <i>sfmC</i>  | It is part of the sfm operon that produces fimbrial surface structures. sfmC has chaperone activity                                                                       |
| <i>sfmD</i>  | It is part of the sfm operon that produces fimbrial surface structures. sfmD has chaperone activity.                                                                      |

Supplementary Table S3. *Klebsiella* strains with complete genomes sequenced used in this thesis work.

| Strain               | Capsular type | Accession number |
|----------------------|---------------|------------------|
| <i>Kp</i> 1088       | KL1           | NJPF000000000    |
| <i>Kp</i> 1          | KL47          | NJPM000000000    |
| <i>Kp</i> NUHL24835  | KL2           | CP014004         |
| <i>Kp</i> KP28872    | KL149         | JABFQQ000000000  |
| <i>Kp</i> KP28873    | KL149         | JABFQR000000000  |
| <i>Kp</i> 2          | KL47          | NJPL000000000    |
| <i>Kp</i> 3          | KL47          | NJPK000000000    |
| <i>Kp</i> 5          | KL47          | NJPJ000000000    |
| <i>Kp</i> 7          | KL47          | NJPI000000000    |
| <i>Kp</i> B1647      | KL51          | MCFO000000000    |
| <i>Kp</i> B20038     | KL30          | MCFP000000000    |
| <i>Kp</i> B20143     | KL24          | MCFQ000000000    |
| <i>Kp</i> B5055      | KL2           | AQCG000000000    |
| <i>Kp</i> BJ1-GA     | KL2           | CBTU000000000    |
| <i>Kp</i> NTUH-K2044 | KL1           | AP006725.1       |
| <i>Kp</i> RJA166     | KL1           | CP019047         |
| <i>Kp</i> RJF293     | KL2           | CP014008         |
| <i>Kp</i> SA1        | KL2           | CBTW000000000    |
| <i>Kp</i> SH-1       | KL47          | PJPG000000000    |
| <i>Kp</i> SWU01      | KL47          | CP018454         |
| <i>Kp</i> T69        | KL2           | CBTV000000000    |
| <i>Kp</i> TK421      | KL20          | CP045694         |
| <i>Kp</i> Kp_whw     | KL5           | CAGKKT01         |
| <i>Kq</i> A708       | KL23          |                  |
| <i>Kq</i> KqPF26     | KL56          | CP065838         |
| <i>Kv</i> 8917       | KL114         | CP063403         |
| <i>Kv</i> AT-22      | KL134         | CP001891         |

|                      |       |                 |
|----------------------|-------|-----------------|
| <i>Kv</i> FH-1       | KL57  | CP054254        |
| <i>Kp</i> LABACER 01 | KL118 | JABXNY000000000 |
| <i>Kp</i> LABACER 27 | KL10  | JABXNZ010000000 |

---
